# Supplementary figures and images for: Macrophages confer survival signals via CCR1-dependent translational MCL-1 induction in chronic lymphocytic leukemia
Source: PubMed Central journal article supplement — Oncogene. 2017 Feb 13;36(26):3651–60. doi: 10.1038/onc.2016.515 (PMC5584520; doi:10.1038/onc.2016.515), 2017-02-13

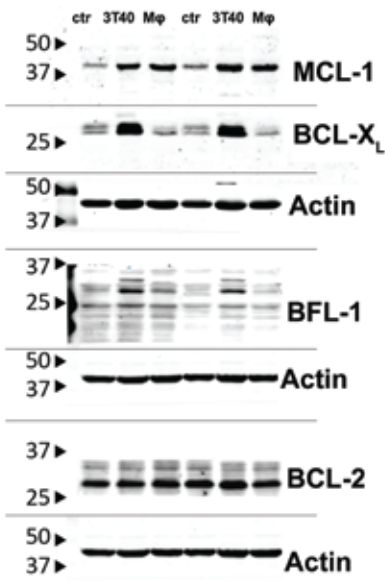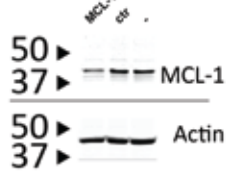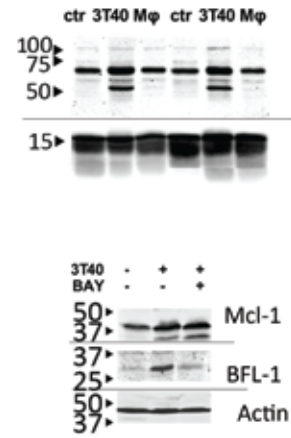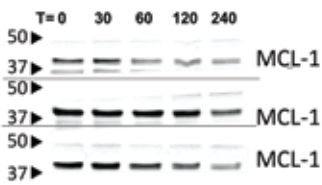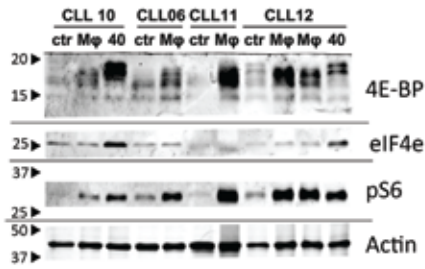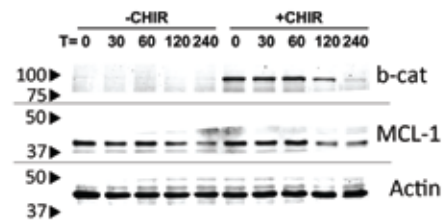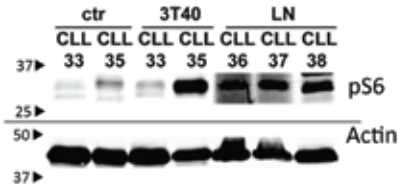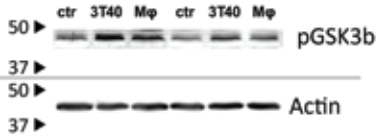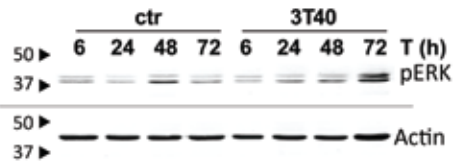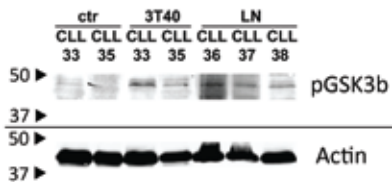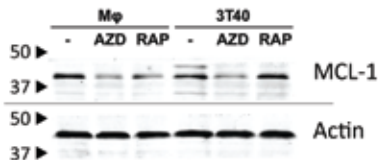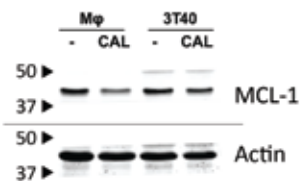

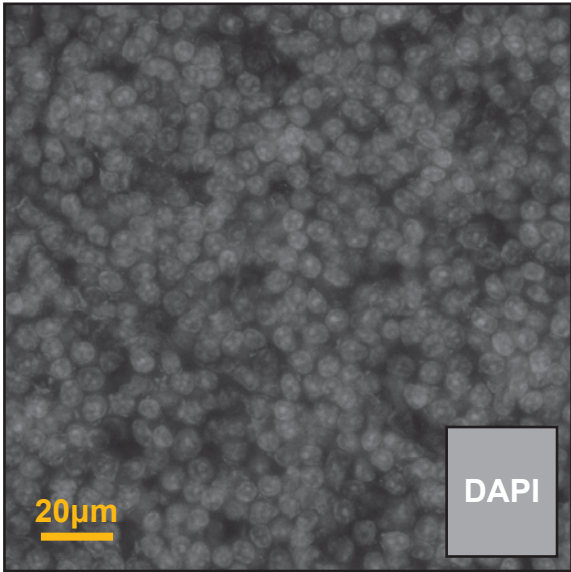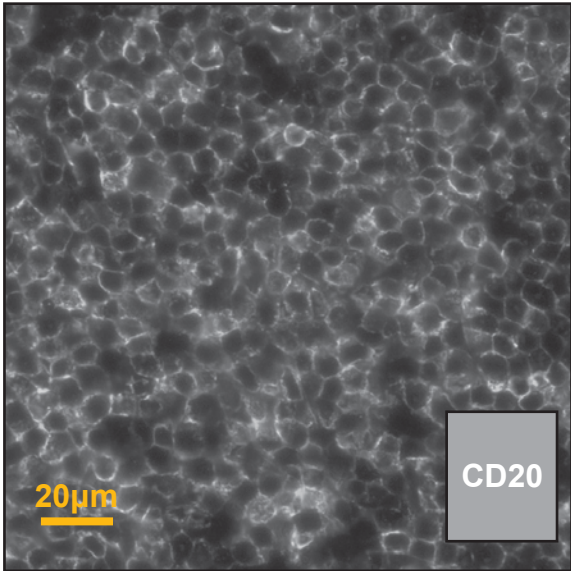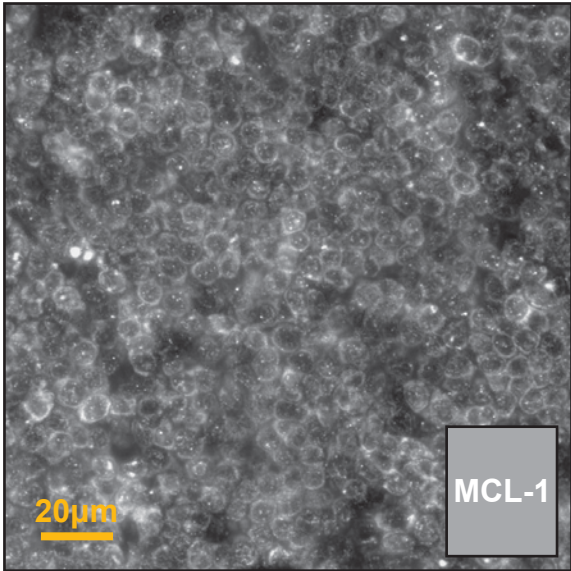

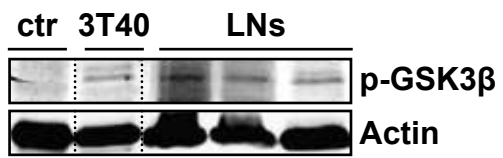

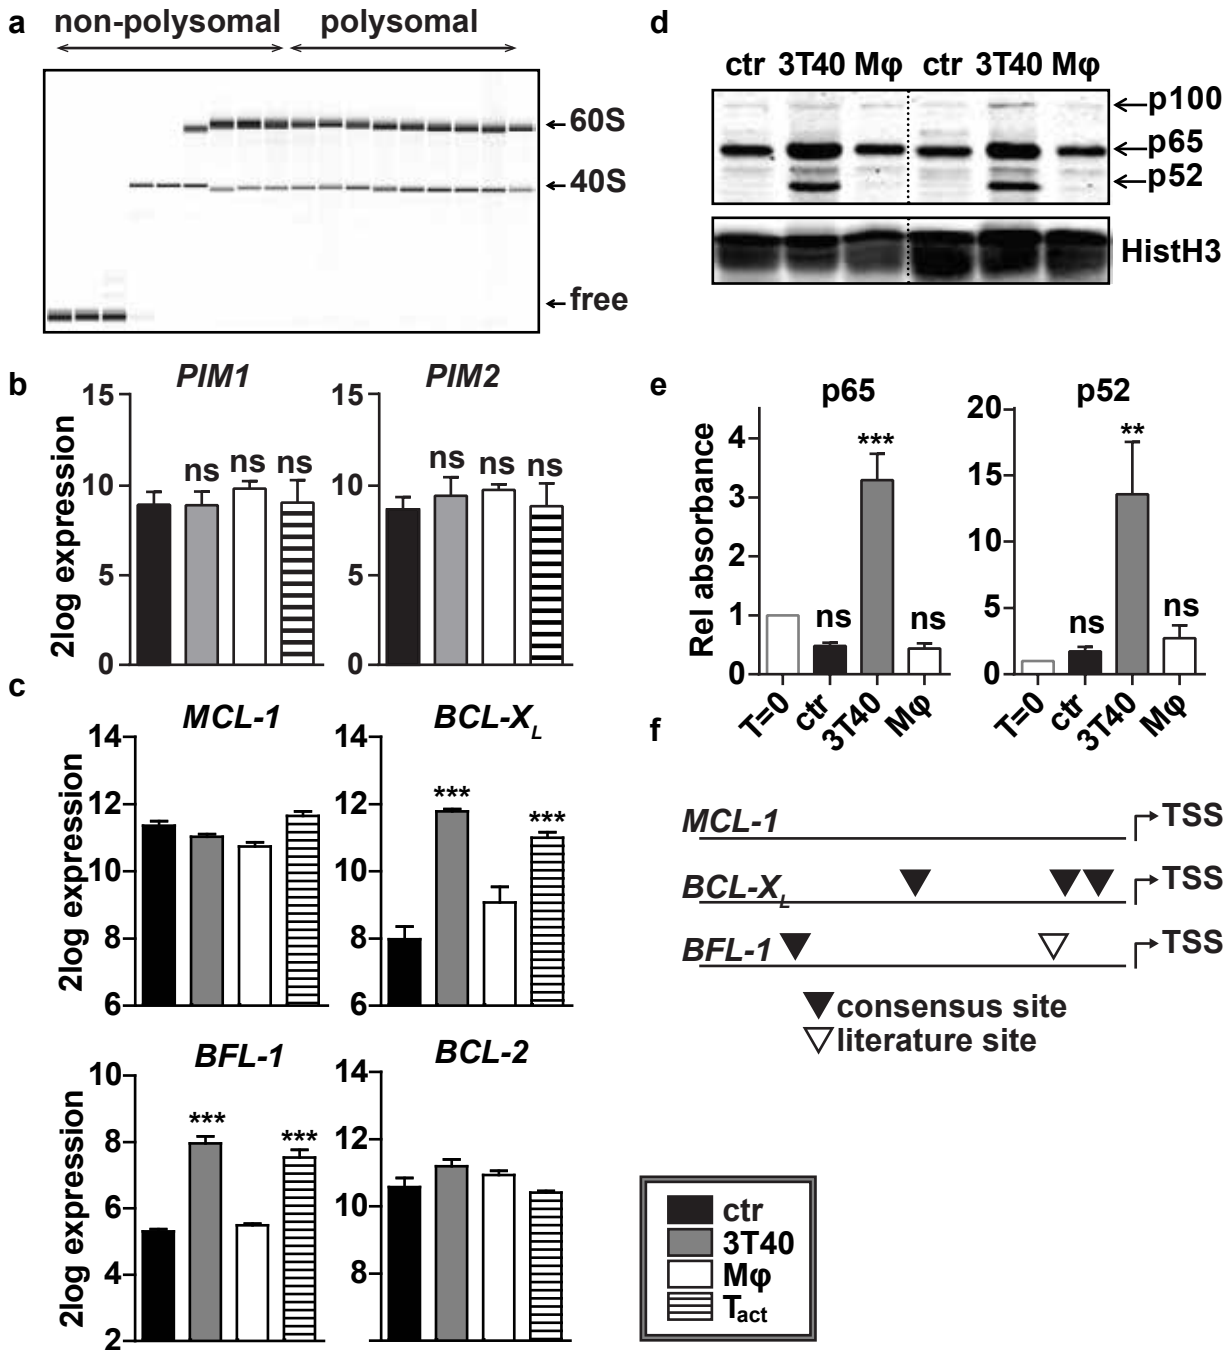

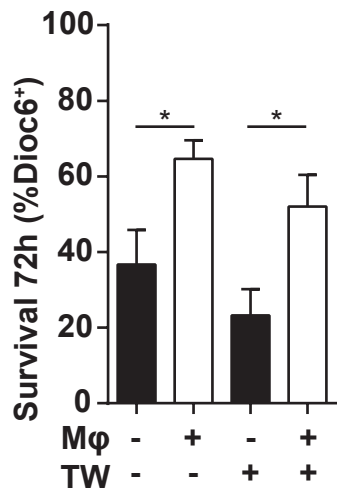

Supplement: onc2016515x2.pdf [file onc2016515x2.pdf]
